# Supplementary material
Source: publisher figshare collection journal article supplement (https://acs.figshare.com/ndownloader/files/9254290)
Supplement: Supplementary file 1 [file 9254290]

# Supporting Information

## **Reactive adsorption desulfurization on Cu/ZnO adsorbent: effect of ZnO polarity ratio on the selective hydrogenation**

*Yaqing Liu, Hongying Wang, Yunqi Liu\*, Jinchong Zhao, Chenguang Liu\**

State Key Laboratory of Heavy Oil Processing, Key Laboratory of Catalysis, China National Petroleum Corporation (CNPC), China University of Petroleum (East China), 66 West Changjiang Road, Qingdao, Shandong 266580, P. R. China

### **Author information**

#### **Corresponding Author**

\*Tel.: +86 532 8698 1861. Fax: +86 832 8698 1861.

E-mail: [liuyq@upc.edu.cn](mailto:liuyq@upc.edu.cn) (Yunqi Liu)

[cgliu.upc.edu.cn@gmail.com](mailto:cgliu.upc.edu.cn@gmail.com) (Chenguang Liu)

|                                                                                                                                                 |    |
|-------------------------------------------------------------------------------------------------------------------------------------------------|----|
| <b>Figure S1</b> the TG patterns of ZnO precursor (a) addition $P_{123}$ ; (b) no addition $P_{123}$ .....                                      | S3 |
| <b>Figure S2</b> XRD patterns of the reduced Cu/ZnO adsorbent .....                                                                             | S4 |
| <b>Figure S3</b> XRD patterns of the spent Cu/ZnO adsorbent .....                                                                               | S4 |
| <b>Table S1</b> the crystal diameter for (100), (002) and (101) .....                                                                           | S5 |
| <b>Figure S4</b> the SAED images of the ZnO supports, (A) $ZnO_{370-10}$ ; (B) $ZnO_{370-0}$ ;<br>(C) $ZnO_{350-10}$ ;(D) $ZnO_{350-0}$ ; ..... | S5 |
| <b>Table S2</b> the properties of FCC gasoline and the products of Cu-based catalyst and<br>Ni-based catalyst .....                             | S6 |
| <b>Figure S5</b> the curve of the breakthrough of the Cu/ZnO catalyst .....                                                                     | S6 |

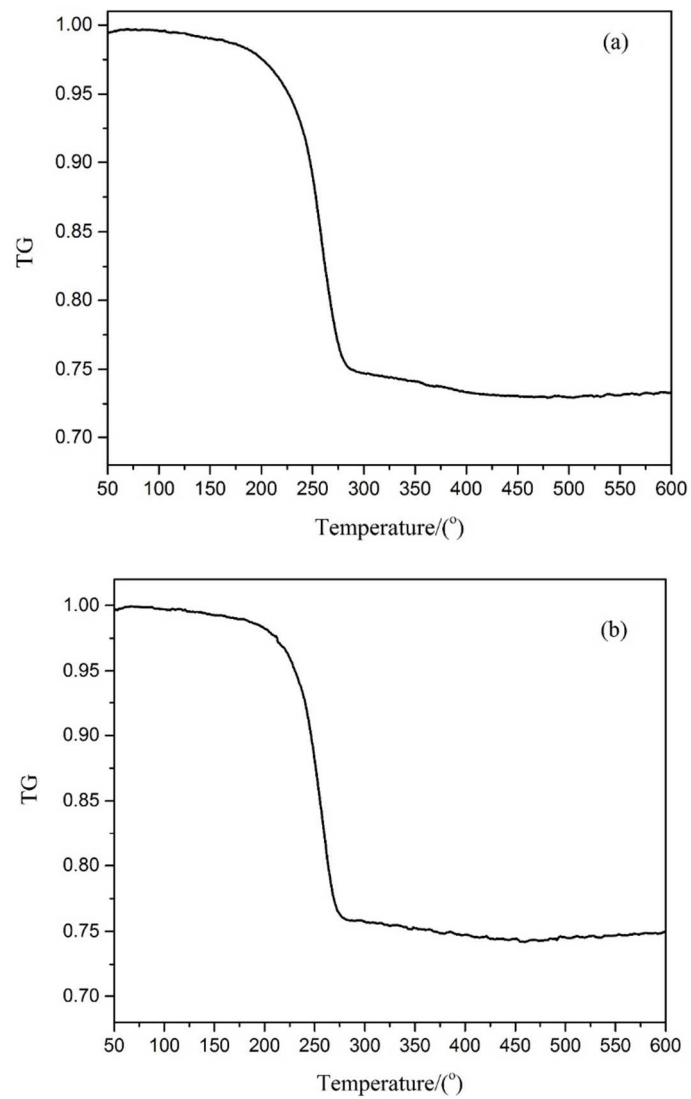

**Figure S1** the TG patterns of ZnO precursor (a) addition  $P_{123}$ ; (b) no addition  $P_{123}$

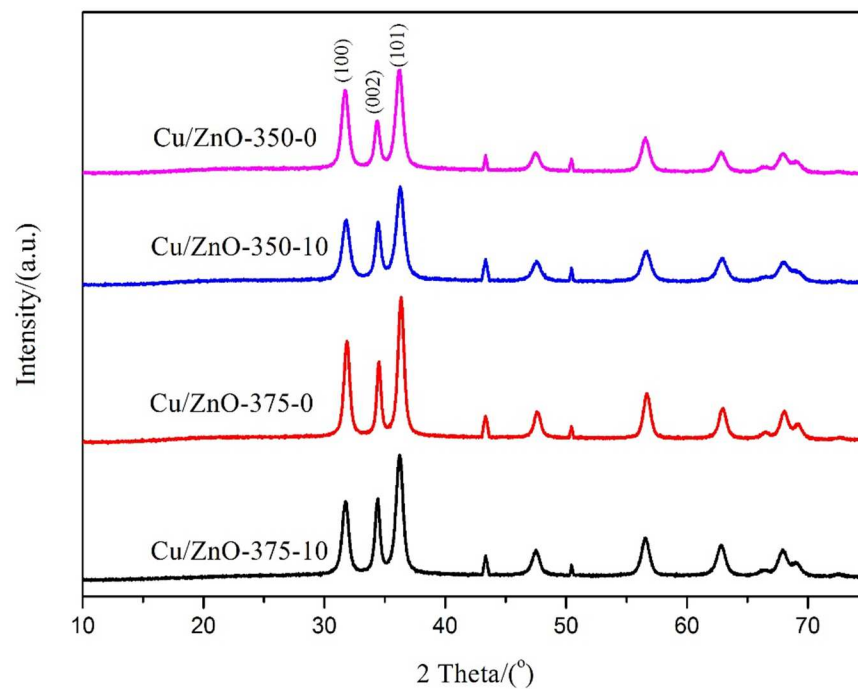

**Figure S2 XRD patterns of the reduced Cu/ZnO adsorbents**

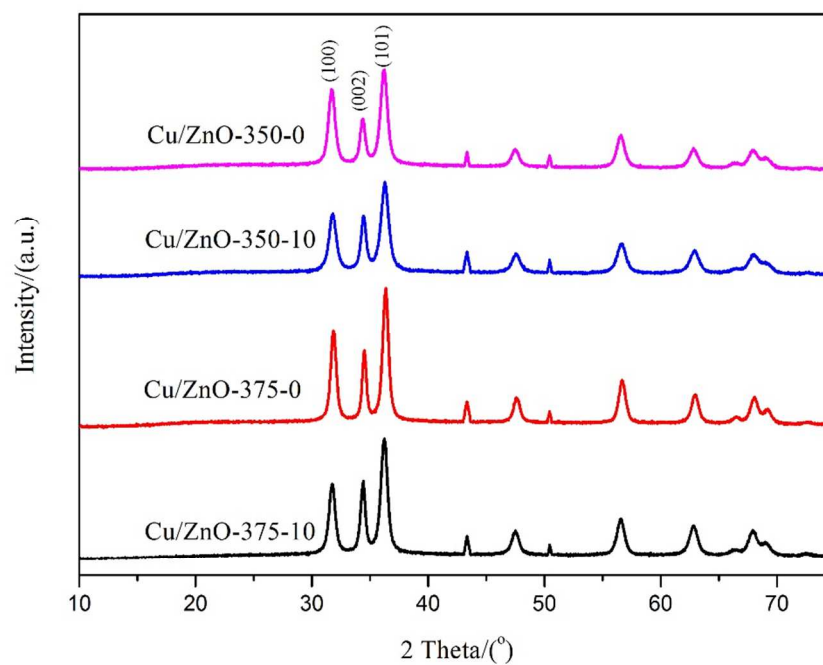

**Figure S3 XRD patterns of the spent Cu/ZnO adsorbents**

**Table S1 the crystal diameter for (100), (002) and (101)**

| Crystal       | ZnO <sub>375-10</sub> | ZnO <sub>375-0</sub> | ZnO <sub>350-10</sub> | ZnO <sub>350-0</sub> |
|---------------|-----------------------|----------------------|-----------------------|----------------------|
| Diameter (nm) |                       |                      |                       |                      |
| 100           | 20.9                  | 17.8                 | 17.8                  | 70.9                 |
| 002           | 46.5                  | 33.8                 | 51.3                  | 58.6                 |
| 101           | 15.8                  | 51.6                 | 18.1                  | 16.7                 |

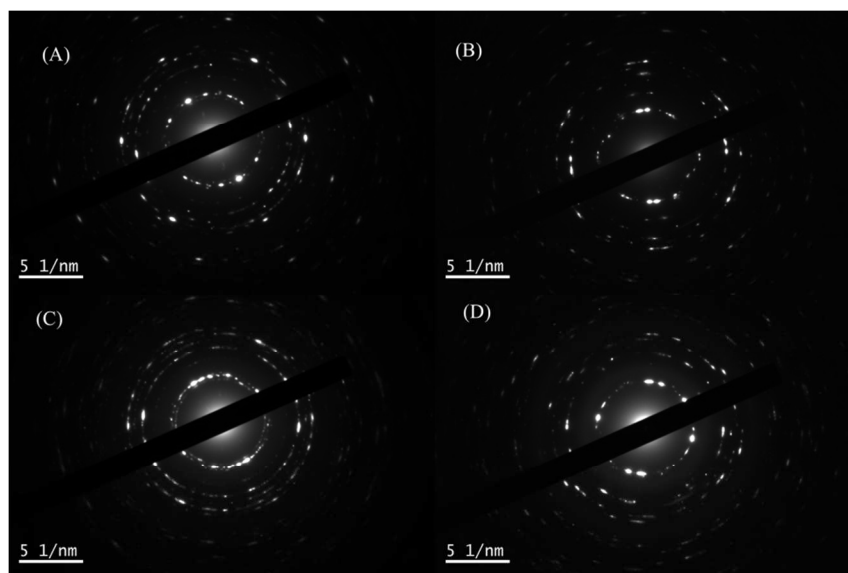

**Figure S4** the SAED images of the ZnO supports, (A)ZnO<sub>370-10</sub>; (B)ZnO<sub>370-0</sub>; (C)ZnO<sub>350-10</sub>; (D)ZnO<sub>350-0</sub>;

**Table S2 the properties of FCC gasoline and the product of Cu-based catalyst and Ni-based catalyst**

|                         | Density<br>/(g/cm <sup>-3</sup> ) | sulfur content<br>(mg/L) | paraffin | olefin | Naphthe<br>nic | Aromati<br>c |
|-------------------------|-----------------------------------|--------------------------|----------|--------|----------------|--------------|
| FCC gasoline            | 0.73                              | 103.3                    | 41.52    | 16.19  | 7.37           | 32.92        |
| Copper-based<br>Product | 0.73                              | <20                      | 46.07    | 14.14  | 8.88           | 30.91        |
| Nickel-based<br>product | 0.73                              | <20                      | 66.14    | 4.92   | 7.79           | 21.15        |

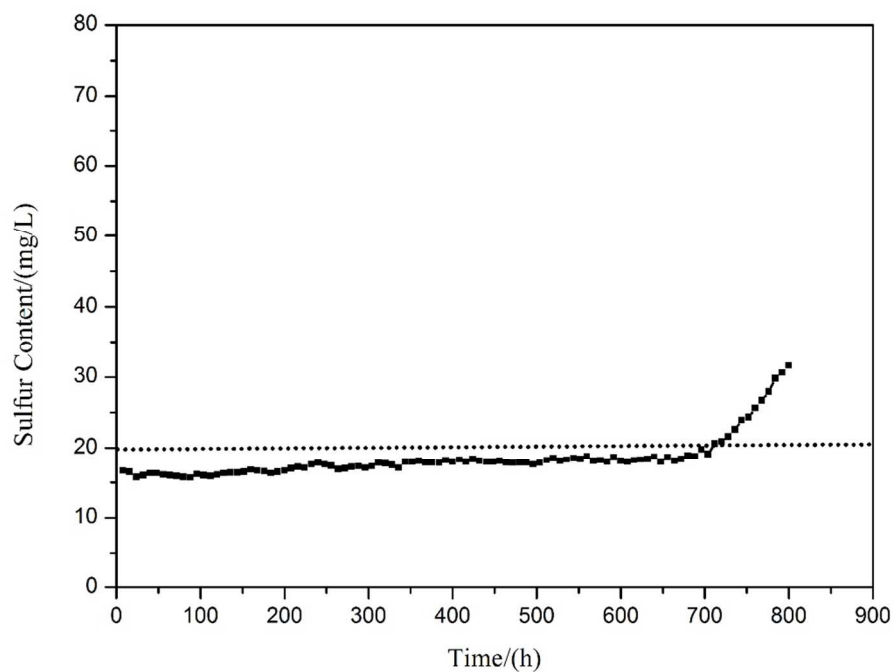

**Figure S5 the curve of the breakthrough of the Cu/ZnO catalyst**
